1 **Genome-scale comparative analysis for host resistance against sea lice between**  
2 **Atlantic salmon and rainbow trout**

3

4 Pablo Cáceres<sup>1</sup>, Agustín Barría<sup>1</sup>, Kris A. Christensen<sup>2</sup>, Liane N. Bassini<sup>3</sup>, Katharina  
5 Correa<sup>4</sup>, Jean P. Lhorente<sup>4</sup>, José M. Yáñez<sup>1,5</sup>

6

7 <sup>1</sup> Facultad de Ciencias Veterinarias y Pecuarias, Universidad de Chile, Av. Santa Rosa  
8 11735, La Pintana, Santiago 8820808, Chile

9 <sup>2</sup> Fisheries and Oceans Canada 4160 Marine Drive, West Vancouver, BC, Canada

10 <sup>3</sup> Escuela de Medicina Veterinaria, Facultad de Ciencias de la Vida, Universidad Andres  
11 Bello, Santiago, Chile.

12 <sup>4</sup> Benchmark Genetics Chile, Ruta 7 Carretera Austral Km 35, Puerto Montt, Chile.

13 <sup>5</sup> Núcleo Milenio INVASAL, Concepción Chile

14

15 jmayanez@uchile.cl

16

17

18

19

20

21

22

23

24

25

26

27

28 **Abstract**

29 Sea lice (*Caligus rogercresseyi*) are ectoparasites that cause major production losses in  
30 the salmon aquaculture industry worldwide. Atlantic salmon (*Salmo salar*) and rainbow  
31 trout (*Oncorhynchus mykiss*) are two of the most susceptible salmonid species to sea lice  
32 infestation. The goal of this study was to identify common candidate genes involved in  
33 resistance against sea lice. For this, 2,626 Atlantic salmon and 2,643 rainbow trout from  
34 breeding populations were challenged with sea lice and genotyped with a 50k and 57k  
35 SNP panel. We ran two independent genome-wide association studies for sea lice  
36 resistance on each species and identified 7 and 13 windows explaining 3% and 2.7%  
37 respectively the genetic variance. Heritabilities were observed with values of 0.19 for  
38 salmon and 0.08 for trout. We identified genes associated with immune responses,  
39 cytoskeletal factors and cell migration. We found 15 orthogroups which allowed us to  
40 identify *dust8* and *dust10* as candidate genes in orthogroup 13. This suggests that similar  
41 mechanisms can regulate resistance in different species; however, they most likely do not  
42 share the same standing variation within the genomic regions and genes that regulate  
43 resistance. Our results provide further knowledge and may help establish better control for  
44 sea lice in fish populations.

45 **Keywords:** *Caligus rogercresseyi*, *Salmo salar*, *Oncorhynchus mykiss*, GWAS, Parasite  
46 Resistance, Comparative Genomics.

47

48

49

50

## 51 Introduction

52 Sea lice, *Caligus rogercresseyi*, first described in 1997 by Boxshall & Bravo<sup>1</sup> are currently  
53 the most harmful parasite in salmon farming worldwide<sup>2</sup>, and are also the main parasite  
54 affecting Chilean salmon production. To date, the economic losses due to this parasite are  
55 mainly associated with the reduction of feed conversion and fish growth, indirect mortality,  
56 loss of product value and treatment costs. It has been estimated that the global costs for  
57 the control of this parasite has reached \$436 million (USD) annually<sup>3</sup>. The parasite life  
58 cycle is comprised of eight stages of development<sup>4</sup>: two states of nauplii, one copepod  
59 state, four chalimus states and the adult state. The stages of nauplii (n1-2) and the stage  
60 of copepods (infectious stage) are planktonic stages. The four stages of chalimus (1-4) are  
61 sessile stages and the adult is a mobile stage<sup>5</sup>.

62 It has been observed that *Caligus* primarily affects Atlantic salmon (*Salmo salar*) and  
63 rainbow trout (*Oncorhynchus mykiss*), while coho salmon (*Oncorhynchus kisutch*) has an  
64 innate lower susceptibility to the parasite<sup>6</sup>. The clinical signs attributed to infection by sea  
65 lice include skin lesions, osmotic imbalance and greater susceptibility to bacterial and viral  
66 infections through the suppression of immune responses by damage to the skin of the  
67 host<sup>7</sup>.

68 Recent studies have estimated significant low to moderate genetic variation for resistance  
69 to *C. rogercresseyi*, with heritability values ranging between 0.12 and 0.32 in Atlantic  
70 salmon when resistance is defined as the number of parasites fixed to all the fins<sup>5,7,8</sup>.  
71 Similarly, when sea lice resistance is defined as the logarithm of the parasite load density,  
72 heritability values range between 0.13 and 0.33 in Atlantic salmon<sup>9,10</sup>. Although significant,  
73 a heritability value of 0.09 for sea lice resistance have been recently reported in rainbow  
74 trout (Bassini et al., submitted)<sup>11</sup>. These results support the feasibility of including

75 resistance to sea lice into breeding programs for both Atlantic salmon and rainbow  
76 trout<sup>5,8,12</sup>.

77

78 Due to increased research efforts focusing on salmonid genomics, there has been a rapid  
79 increase in the discovery of Atlantic salmon and rainbow trout SNP markers and high-  
80 density SNP genotyping panels have been developed for both species<sup>13-15</sup>. The availability  
81 of a reference genome for rainbow trout<sup>16</sup> and Atlantic salmon<sup>17</sup> have allowed genomic  
82 regions associated with resistance to diseases to be identified and annotated. For  
83 example, it has been possible to identify regions associated with resistance to bacterial  
84 diseases such as *Piscirickettsia salmonis*<sup>18</sup>, *Flavobacterium psychrophilum*<sup>19,20</sup> and also  
85 parasitic diseases<sup>7,10</sup> in both species.

86 Comparative genomic approaches<sup>21</sup> allow the identification of genomic similarities between  
87 evolutionarily distant species, such as: conserved genes, traces of genome duplication  
88 and the comparison of gene function in different species<sup>22</sup>. Traditionally, comparative  
89 genomics analyses have focused on orthologous genes (genes related to each other  
90 resulting from direct transmission from a common ancestor)<sup>22</sup>. Comparative genomic  
91 studies between salmonids have mainly focused on finding evolutionary similarities, such  
92 as quantitative trait loci (QTL) related to growth or sexual differentiation<sup>23-25</sup>. To date, there  
93 have been no studies comparing genomic regions associated with resistance to *Caligus* in  
94 salmonid species.

95 The objective of the present study was to: i) identify genomic regions associated with  
96 resistance to *Caligus rogercresseyi* in Atlantic salmon and rainbow trout through GWAS,  
97 and ii) identify functional candidate genes potentially related to trait variation through a  
98 comparative genomics approach based on exploring orthologous genes within the  
99 associated regions across species.

100

## 101 **Results and Discussion**

102 The comparative genomics analysis used in this study, allowed us to identify groups of  
103 ortholog genes and several candidate genes among adjacent SNP that explained more  
104 than 1% of the significant genetic variance for resistance to *Caligus rogercresseyi*. This  
105 first study which compared resistance in both salmonid species, focused on candidate  
106 genes which function either to directly defend against the parasite or that participate in  
107 defense mechanisms against this parasite.

108 There was no difference between the average number of sea lice found on Atlantic salmon  
109 or rainbow trout in the experimental challenge (Table 1). An average of  $5.9 \pm 6.6$  and  $6.1 \pm$   
110  $4.2$  was estimated for Atlantic salmon and rainbow trout, respectively. In terms of the  
111 maximum number of parasites, this value varied from 106 parasites in Atlantic salmon to  
112 28 in rainbow trout. For both species, there were animals that did not present with any  
113 parasites. The average weight at the end of the experimental challenge was  $278.1 \pm 90.3$   
114 g (ranging from 104 to 569 g) and  $173.1 \pm 31.4$  g (ranging from 86 to 265 g), for Atlantic  
115 salmon and rainbow trout, respectively. Although the average number of parasites was not  
116 significantly different between the two species, the difference in the average final weight at  
117 the end of each challenge could explain the difference in the maximum number of  
118 parasites found (~4 times more parasites in the larger Atlantic salmon). The number of  
119 parasites counted in each species after the challenge is below the range determined in  
120 previous studies. For instance, Ødegård *et al.* (2014)<sup>9</sup> obtained an average of  $20.96 \pm$   
121  $19.68$ , while Robledo *et al.* (2018)<sup>26</sup> reported an average of  $38 \pm 16$ .

122 To measure resistance to *C. rogercresseyi* we used the logarithm of lice density (LogLD),  
123 which allows for correction to the number of parasites based on the body weight of each

124 fish<sup>9</sup>. The empirical LogLD distribution for both species is shown in Figure 1. The range of  
125 LogLD for Atlantic salmon was greater than for rainbow trout, varying from -4.18 to 1.023  
126 and from -3.69 to 0.03, respectively. The average LogLD distribution in the present study  
127 was  $2.12 \pm 0.89$  and  $1.64 \pm 0.65$  for Atlantic salmon and rainbow trout, respectively, which  
128 are similar values to those reported in a previous study in a different Atlantic salmon  
129 population (between  $-1.66 \pm 0.73$  and  $-2.55 \pm 0.58$ )<sup>9</sup>.

130 A total of 2,040 (77.6%) Atlantic salmon, and 45,117 (96.7%) SNPs passed genotyping  
131 quality control, while in rainbow trout, 2,466 (93.3%) individuals and 27,146 (67.4%) SNP  
132 remained. In both species, significant genetic variation for resistance to *C. rogercresseyi*  
133 was estimated by using genomic information, with heritability values of  $0.19 \pm 0.03$  and  
134  $0.08 \pm 0.01$  for Atlantic salmon and rainbow trout, respectively (Table 2). Tsai *et al.*  
135 (2016)<sup>10</sup>, estimated genomic heritability values for resistance against *L. salmonis* of  $0.22 \pm$   
136  $0.08$  and  $0.33 \pm 0.08$ , while Ødegård *et al.* (2014)<sup>9</sup>, observed heritability values of  $0.14 \pm$   
137  $0.03$  and  $0.13 \pm 0.03$  in Atlantic salmon. Similarly, Yañez *et al.* (2014) and Correa *et al.*  
138 (2017)<sup>8,12</sup> estimated values ranging from 0.10 to 0.12 when defining resistance as the total  
139 number of parasites found on all fins using genomic and pedigree information, and  
140 Lhorente *et al.* (2012)<sup>5</sup> estimated heritability values of  $0.22 \pm 0.06$  in Atlantic salmon with  
141 traits of total count of sessile sea lice per fish and body weight.

142 We found 5 chromosomes harboring 7 loci explaining more than 1% of the genetic  
143 variance for sea lice resistance in Atlantic salmon (Figure 2). In general, these regions  
144 explained a low percentage of the total genetic variation with a maximum of 3% explained  
145 by a single locus. Thus, two SNP windows (a window was defined as 20 contiguous SNPs)  
146 in *Ssa3* explained 1% and 1.4% of the genetic variance. In *Ssa6* there was a window that  
147 explained up to 1.9% of the genetic variance, while two windows that explained 1.7% and  
148 3% were found in *Ssa9*. In addition, in *Ssa20* and *Ssa25* we found windows that explained

149 1.05% and 1.33%, respectively. Table 3 shows the variance explained by each window of  
150 SNP in both species.

151 For rainbow trout the GWAS for LogLD identified 13 regions located in 13 different  
152 chromosomes that exceeded 1% of the total genetic variance (Figure 2). Similar to Atlantic  
153 salmon, these windows explained a low percentage of the total variance with a maximum  
154 of 2.77%; nevertheless, the number of regions surpassing 1% of the genetic variance  
155 explained was almost double in rainbow trout compared to Atlantic salmon. The important  
156 genomic regions in rainbow trout were located on chromosomes *Omy2*, *Omy3*, *Omy4*,  
157 *Omy7*, *Omy9*, *Omy10*, *Omy14*, *Omy15*, *Omy16*, *Omy21*, *Omy26*, *Omy28* and *Omy29*, and  
158 explained 1.6%, 1.7%, 1.03%, 1.17%, 1.6%, 1.2%, 1.4%, 2.77%, 1.07%, 1.3%, 2.3%,  
159 1.7% and 1.2% of the genetic variance for LogLD, respectively (Table 3).

160 As has been previously reported for other disease resistance traits in aquaculture  
161 species<sup>18,20,27–29</sup>, our results suggest that sea lice resistance is mainly of polygenic nature  
162 (i.e. many genes with small effect are involved in the trait). These results agree with  
163 previous studies on sea lice resistance, where a similar genetic architecture was  
164 suggested by Tsai *et al.* (2016), Rochus *et al* (2018) and Correa *et al.* (2017)<sup>7,10,30</sup> for  
165 *Lepeophtheirus salmonis* and *C. royercesseyi* resistance. Recently Robledo *et al* (2018)<sup>31</sup>  
166 described three QTL in Atlantic salmon related to sea lice resistance, using RNA-seq and  
167 WGS data. Since sea lice resistance is polygenic, the genetic improvement of sea lice  
168 resistance would most likely be best accomplished by means of genomic selection instead  
169 of marker assisted selection. For instance, Correa *et al* (2017) and Tsai *et al* (2016)<sup>10,12</sup>  
170 have shown an increase in the accuracy of estimated breeding values (EBVs) using  
171 genomic selection, over the use of pedigree-based models<sup>9</sup>.

172 The exploration of the genes within the windows that explained over 1% of the genetic  
173 variance for LogLD showed a series of possible candidate genes that were classified into

174 three groups: related to the immune response, cytoskeleton or metalloproteases. The  
175 genes are listed in Table 3 and Table 4 for Atlantic salmon and rainbow trout, respectively.

176 In salmonids, the main response of the immune system to parasites is mediated by T-  
177 Helper 1 and T-Helper 2<sup>32</sup> cells. Thus, genes related with immune response, either by  
178 promoting leukocyte growth or favoring migration or activation are strong candidate genes.  
179 For instance, in Atlantic salmon we found *T-cell activation Rho GTPase-activating protein*  
180 (TAGAP) which participates in the activation and recruitment of T cells by cytokines<sup>33</sup>, and  
181 *tenascin R* (TNR) which is an extracellular matrix protein, present in bone marrow, thymus,  
182 spleen and lymph nodes<sup>34</sup>. The latter has been described as having an adhesin function  
183 favoring the mobility of lymphocytes and lymphoblasts<sup>34,35</sup>. In rainbow trout, we found  
184 candidate genes with similar functions, such as, T-box 21 (*tbx21*), also known as T-bet (*T-*  
185 *box expressed in T cells*). This gene belongs to the sub Tbr1 family<sup>36</sup>, and generates type  
186 1 immunity and participates in the maturation and migration of T-helper 1 (Th1) cells,  
187 which in turn produce interferon-gamma (IFN- $\gamma$ ). Studies have described T-bet expression  
188 in NK cells (natural killer), dendritic cells and T CD8+ cells<sup>37,38</sup>. A recent study<sup>26</sup> on gene  
189 expression with *C. rogercresseyi* infestation in susceptible and resistant Atlantic salmon  
190 indicated that several components of the immune system (inflammatory response,  
191 cytokine production, TNF and NF-kappa B signaling and complement activation) and  
192 tissue repair are upregulated during infection.

193 *Forkhead box protein N1-like* (FOXN1) present on *Ssa9* of Atlantic salmon is part of a  
194 family of genes widely studied in humans, which are related to various functions including  
195 cell growth, lymph node development and T cell differentiation<sup>39</sup>. In addition, it has been  
196 proposed that FOXN1 has a role in the activation of fibroblast growth factor receptors<sup>39</sup>.

197 Meanwhile in trout on *Omy21*, *serine/threonine-protein phosphatase 2A 56 kDa* was  
198 identified, which is described as having participated in cell growth and signaling<sup>40</sup>. Robledo



199 *et al.* (2018)<sup>26</sup> recently found that in Atlantic salmon, this protein showed the most  
200 significant change in the expression ratio between healthy skin and skin where sea lice  
201 were found<sup>26</sup>. In Atlantic salmon, we identified *Tripartite motif-containing protein 45* (TRIM)  
202 on *Ssa25* which belongs to a large family of proteins present in diverse organisms that can  
203 function as a ligase, and can modify ubiquitins and proteins stimulated by interferon of 15  
204 kDa (ISG15)<sup>41</sup>.

205 Warm-water fish, such as Zebrafish (*Danio rerio*) and rita catfish (*Rita rita*), lower  
206 infiltration of neutrophils, favoring wound closing by means of accelerated growth of the  
207 epidermis which can take place in a few hours<sup>42</sup>. In coho salmon (*Oncorhynchus kisutch*) it  
208 has been observed that a neutrophil infiltration occurs until the second day after sea lice  
209 infestation, together with an inflammatory reaction and hyperplasia in the zone<sup>43</sup>, with  
210 posterior leukocyte recruitment and migration.

211 Several metalloproteases were found in both species, but for the interest of this study, we  
212 focused on GEM-interacting protein which interacts with Rab27a or its effector in  
213 leucocytes. Rab is a large family of small GTPases responsible for vesicle cellular  
214 transport<sup>44</sup>. Deficiencies of this molecule or the related human protein (?), is correlated  
215 with immune deficiencies due to the malfunction of cytotoxic activity of T-lymphocytes,  
216 natural killer cells and neutrophils<sup>45</sup>.

217 Considering the importance of cell growth and movement in response to sea lice  
218 infestation, the cytoskeleton may play a considerable role in this response as well. Genes  
219 related to the cytoskeleton were identified, such as epidermal growth factor (EGF), found  
220 on *Ssa9*. This gene is part of a superfamily of receptors with tyrosine kinase activity that  
221 have been described in a variety of organs with growth promoter functions, cellular  
222 differentiation<sup>46</sup> and could participate in tissue repair by promoting cell growth<sup>36</sup>. In  
223 rainbow trout, fibroblast growth factors (*fgf11* - *Omy10*, *fgf13* - *Omy29*) have similar

224 functions (angiogenesis and pro-inflammatory response), and were identified as important  
225 genes involved in sea lice resistance by Skugor *et al.* (2009) and Robledo *et al.* (2018) in  
226 Atlantic salmon<sup>26,43</sup>.

227 *ELMO/CED-12 domain-containing prot 1* was identified on *Omy10* of the trout. This protein  
228 is characterized mainly from research in the model organism *C. elegans*. *ELMO/CED-12*  
229 *domain-containing prot 1* participates in the phagocytosis of apoptotic cells, and in  
230 mammals it also has a role in cell migration<sup>47</sup>. Other cytoskeleton related candidate genes  
231 include: *Procollagen galactosyltransferase 1* present on *Ssa6*, *collagen alpha-1 (XXVIII)*  
232 *chain-like* on *Ssa25* and *pleckstrin homology domain-containing family H member 1-like*<sup>48</sup>.

233 The top ten SNPs that explained the greatest variance are located on *Ssa9* of the Atlantic  
234 salmon, in close proximity to the *breast carcinoma-amplified sequence 3 (bcas3)* gene,  
235 which in Atlantic salmon codes for a cell migration factor associated with microtubules that  
236 favors cellular mobility<sup>49</sup>. Cell migration is generally induced in response to chemotactic  
237 signals, which induces changes in the cytoskeleton and extracellular matrix<sup>50</sup>.

238 We also found in trout, the *tripartite motif-containing protein 16-like* on *Omy15*, which is  
239 part of the TRIM superfamily and has functions related to cell differentiation, apoptosis,  
240 regulation of transcription and signaling pathways<sup>41</sup>. This gene is similar to *Tripartite motif-*  
241 *containing protein 45* present on *Ssa25*. In this region, we also found a locus that codes  
242 for interferon- $\gamma$  2 (*ifng2*), which is a cytokine that participates in type 1 immune responses  
243 and that favors the presentation of antigens and activation of macrophages<sup>51</sup>. On this  
244 same chromosome (*Omy15*), we also identified *putative ferric-chelate reductase 1 (frs1)*,  
245 which has been described as having functions in the fixation of iron in teleosts<sup>52</sup>. Robledo  
246 *et al.* (2018)<sup>26</sup> identified *heme-binding protein 2 (HEBP2)* as a gene involved in Atlantic  
247 salmon sea lice resistance, which has an iron-binding function. Different authors<sup>53,54</sup> have

248 stated that decreasing the availability of iron can be part of a nutritional defense  
249 mechanism against sea lice infestation.

250 The analyses performed show regions of synteny between both species (Figure 3): there  
251 are homologous regions that share similarity between the chromosomes across species.  
252 However, there was no obvious shared sea lice resistance associations between Atlantic  
253 salmon and rainbow trout (Figure 3). It is possible that similar mechanisms regulate  
254 resistance between the two species, but the examined populations did not share the same  
255 standing variation of the genes regulating resistance. For example, *Ssa03* (Atlantic  
256 salmon) shares homology with *Omy28* (rainbow trout) and *Ssa25* with *Omy03*. When  
257 performing the search for genes by chromosome (see Table 4), it was not possible to  
258 identify genes that were shared in the indicated regions that were related to the trait  
259 studied.

260

261 We determined 15 orthogroups were shared between both species (Table S1), which we  
262 classified according to gene ontology annotations<sup>55</sup>. One the most interesting groups is  
263 orthogroup 12 which contained lysophosphatidic acid receptor 2-like (LPA<sub>2</sub>) of Atlantic  
264 salmon and rainbow trout G-protein coupled receptor 12-like and an uncharacterized  
265 protein. This orthogroup shares the same GO categories (GO: 0004930, GO: 0007186,  
266 GO: 0016021, GO: 0070915, GO: 0007165, GO: 0016020) related to the receptor  
267 signaling pathway associated with protein G. The activation of LPA<sub>2</sub> participates in multiple  
268 biological processes, such as cytoskeleton modification via actin fiber formation<sup>56</sup> and  
269 have a role in the activation of related adhesion focal tyrosine kinase (RAFTK)<sup>57</sup>, which in  
270 turn participates like a stimulating factor for monocytes and macrophages<sup>58</sup>. In orthogroup  
271 13, we identified *dual specificity protein phosphatase 10-like (dust10)* in Atlantic salmon  
272 and *dual specificity protein phosphatase 8 (dust8)* in rainbow trout. These genes have

273 similar annotations in both species, which have the function of inactivating p38<sup>59</sup> within the  
274 MAPK cascade<sup>60</sup>.

275

## 276 **Conclusion**

277 The GWAS performed here for Atlantic salmon and rainbow trout made it possible to  
278 compare the genetic basis of sea lice resistance in both species. We found novel  
279 information about the resistance of Atlantic salmon and rainbow trout to sea lice, which  
280 suggests that there might be a response mediated by leukocytes, and at the same time,  
281 the cytoskeleton to promote cell mobility and repair of the wound. The analysis of  
282 orthologous proteins provided few characterized proteins, therefore, further investigations  
283 of these species are needed to better annotate genes and generate advances in the  
284 elucidation of genetics behind resistance to *Caligus rogercresseyi* and other important  
285 biologically and economic important traits. Although we did not find common genes  
286 explaining resistance between species, we found potential functional genes that can be  
287 classified under similar mechanisms. These results suggest that it is possible that similar  
288 mechanisms regulate resistance between Atlantic salmon and rainbow trout. Our results  
289 provide further knowledge to help establish better control and treatment measures for one  
290 of the most important parasitic diseases affecting salmon and trout aquaculture.

291

292

## 293 **Material and methods**

### 294 **Rainbow trout**

295 A total of 2,643 rainbow trout were sampled for this study. The fish originated from 105  
296 maternal, 2012 year-class, full-sib families, and belonged to a broodstock population of  
297 Aguas Claras S.A company. The fish were separated into three different ponds so that  
298 each family was equally represented in each pond. The sea lice infestation was initiated  
299 with 105,600 copepodites, on average, an infestation pressure of 40 copepods/fish  
300 (produced *in vitro* from ovigerous females). The infestation consisted of depositing the  
301 copepodites in each test pond, stopping the flow of water and keeping the pond in  
302 darkness for a period of 6 hours. On the sixth day after infestation, parasite counting was  
303 performed and caudal fins were sampled for genetic analysis. All the salmon are  
304 euthanized and fins were examined for parasite count using a stereoscopic magnifying  
305 glass. Wet body weight was recorded for each animal at the end of the challenge.

306

### 307 **Atlantic salmon**

308 A total of 2,628 Atlantic salmon smolts belonging to 118 maternal full-sib families from a  
309 2010 year-class of Salmones Chaicas, X Región, Chile, were challenged with *C.*  
310 *rogercresseyi*. The fish were PIT-tagged (Passive Integrated Transponder), acclimated  
311 and distributed into three ponds as described in previous studies<sup>5,8</sup>. Infestation with the  
312 parasite was carried out using 13 to 24 copepods per fish, stopping the flow of water for 6  
313 hours after the infestation. The challenge lasted 6 days, then the fish were euthanized and  
314 the sea lice were counted on all of the fins. A sample of tail fin was taken for genetic  
315 analysis and the wet body weight of each fish was measured.

316

### 317 **Genotyping**

318 Genomic DNA was extracted from the caudal fin of each challenged fish using the DNeasy  
319 Blood & Kit tissue kit (Qiagen), following the manufacturer's instructions. The Atlantic  
320 salmon samples were genotyped using an Affymetrix® 50K Axiom® myDesign™  
321 Genotyping Array designed by Aqualnovo and the University of Chile<sup>61</sup>, and the rainbow  
322 trout samples were genotyped with a 57K SNP array developed by the USDA<sup>13</sup>.  
323 Quality control of the genotypes was carried out in PLINK<sup>62</sup>. SNPs with a call rate  $\leq 0.95$ ,  
324 a major allele frequency (MAF)  $< 0.05$  and those that were not in Hardy-Weinberg  
325 equilibrium ( $p < 1 \times 10^{-6}$ ) were discarded. Individuals were filtered if they had a call rate  $\leq$   
326 0.95. All the SNPs and fish that passed quality control, were used for downstream  
327 analysis.

328

### 329 **Genomic Association Analysis**

330 Resistance to *C. rogercresseyi* was defined as follows, according to Ødegård *et al.*  
331 (2014)<sup>9</sup>:

$$332 \text{LogLD} = \log_e \left( \frac{LC+1}{\sqrt[3]{BW^2}} \right)$$

333 Where LD is the Caligus density defined as the Caligus count (LC) on each fish at the end  
334 of the experimental challenge divided by the cube root of the body weight of the fish on the  
335 same day (BW) squared, is an approximation of the surface of the skin of each fish. The  
336 logarithm of LD was used as it has an approximately normal distribution.

337 Single step genomic BLUP (ssGBLUP) and wide single step genomic BLUP with two  
338 iterations (wssGBLUP)<sup>63</sup> was used to identify associations between SNPs and resistance  
339 to *Caligus rogercresseyi*, using the BLUPF90 family of programs<sup>64</sup>. Both approaches use

340 the combination of a genomic and pedigree matrix. Genotype and pedigree information  
341 was used to generate the kinship matrix  $H^{65}$  with the following equation:

$$342 \quad H^{-1} = A^{-1} + \begin{bmatrix} 0 & 0 \\ 0 & G^{-1} - A_{22}^{-1} \end{bmatrix}$$

343 Where  $A^{-1}$  is the inverse relationship matrix, for all the animals, constructed from the  
344 pedigree,  $A_{22}^{-1}$  is the inverse of the pedigree matrix produced from genotyped animals, and  
345  $G^{-1}$  is the reverse matrix of genomic relationship. The SNPs were weighted with equal  
346 value and assigned the constant 1 to perform the ssGBLUP method. For the wssGBLUP  
347 method, the markers used weights estimated by the previous method. The association  
348 analysis for both traits were performed using the following mixed linear model  $y = \mathbf{Xb} + \mathbf{Za}$   
349  $+ e$ , where  $\mathbf{y}$  is the vector of phenotypic values (LogLD);  $\mathbf{b}$  is the fixed effects vector (tank);  
350  $\mathbf{a}$  is the vector for random effects considering the structure of covariance between  
351 individuals established by matrix  $\mathbf{H}$ ; and  $\mathbf{e}$  is the vector for the random residuals;  $\mathbf{X}$  and  $\mathbf{Z}$   
352 are the incidence matrices for fixed and individual effects respectively.

353 To identify the regions of the genome associated with the traits analyzed, we identified  
354 windows of 20 adjacent SNPs where 1% or more of the phenotypic variance was  
355 explained, similar to Neto *et al* (2019)<sup>66</sup>. The cumulative percentage of variance explained  
356 for each trait was visualized using a Manhattan plot in R<sup>67</sup>.

357

### 358 **Genome comparison**

359 The rainbow trout (GCF\_002163495.1)<sup>68</sup> and Atlantic salmon (GCF\_000233375.1)<sup>17</sup>  
360 genomes were downloaded from the NCBI and subset for chromosomes associated with  
361 sea lice resistance was downloaded using samtools<sup>69</sup>. Synteny between the chromosomes  
362 was identified by aligning the sequences using the program Symap v3.4<sup>70</sup>. Circos<sup>71</sup> was

363 used to plot the relationships between rainbow trout and Atlantic salmon chromosomes  
364 and to plot sea lice resistance associations to their respective locations.

365

### 366 **Candidate Genes**

367 The flanking sequences surrounding SNPs associated with sea lice resistance were  
368 aligned to the most recent reference genomes of rainbow trout and Atlantic salmon using  
369 BLASTn<sup>72</sup>. The sequence was saved in FASTA format. BLASTx was then used to identify  
370 coding sequences for proteins in these associated windows. Blast2Go<sup>73</sup> was used in  
371 parallel with the FASTA file to identify proteins and select them by function.

372 For both species, the reference genome of *Danio rerio* (GenBank Assembly Accession:  
373 GCA\_000002035.4) was used to annotate proteins that were not characterized in the  
374 rainbow trout or Atlantic salmon reference genomes. To identify orthologous  
375 proteins/genes between species, the OrthoFinder<sup>74</sup> program was used with the FASTA  
376 sequences obtained with BLASTx.

377

### 378 **Ethics approval and consent to participate**

379 All the experimental challenges were approved by the Comité Institucional de Cuidado y  
380 Uso de Animales of the Universidad de Chile (Certificate N 17,041-VET-UCH).

381

### 382 **Consent for publication**

383 Not applicable

384



385 **Availability of data and material**

386 Atlantic salmon phenotype and genotype data are available at Figshare  
387 ([10.6084/m9.figshare.7676147](https://doi.org/10.6084/m9.figshare.7676147)). Rainbow trout phenotypic and genotype data are  
388 available in the same repository ([https://figshare.com/s/ 5219597a19f23873fda3](https://figshare.com/s/5219597a19f23873fda3)).

389

390 **Conflict of interest statement**

391 The Authors declare no conflict of interest.

392

393 **Authors' contributions**

394 PC assessed the analyses and wrote the initial version of the manuscript. AB contributed  
395 with results interpretation discussion and writing. KC contributed with genome comparison  
396 analysis, writing and discussion. LNB and KC managed samples, performed DNA  
397 extraction and performed the quality control of genotypes. JPL contributed with the study  
398 design. JMY conceived the study, contributed to results interpretation with a discussion. All  
399 authors approved the manuscript.

400

401 **Acknowledgments**

402 The current work was funded by Period: 2016-2019, Funding Agency: Research Council  
403 United Kingdom and CONICYT, Chile. Project Number: MR/N026144/1 PI: UK: Ross  
404 Houston; Chile: José M. Yáñez Co-researcher: John Hickey Institutions: The Roslin  
405 Institute - The University of Edinburgh; University of Chile; Aquainnovo

406

407

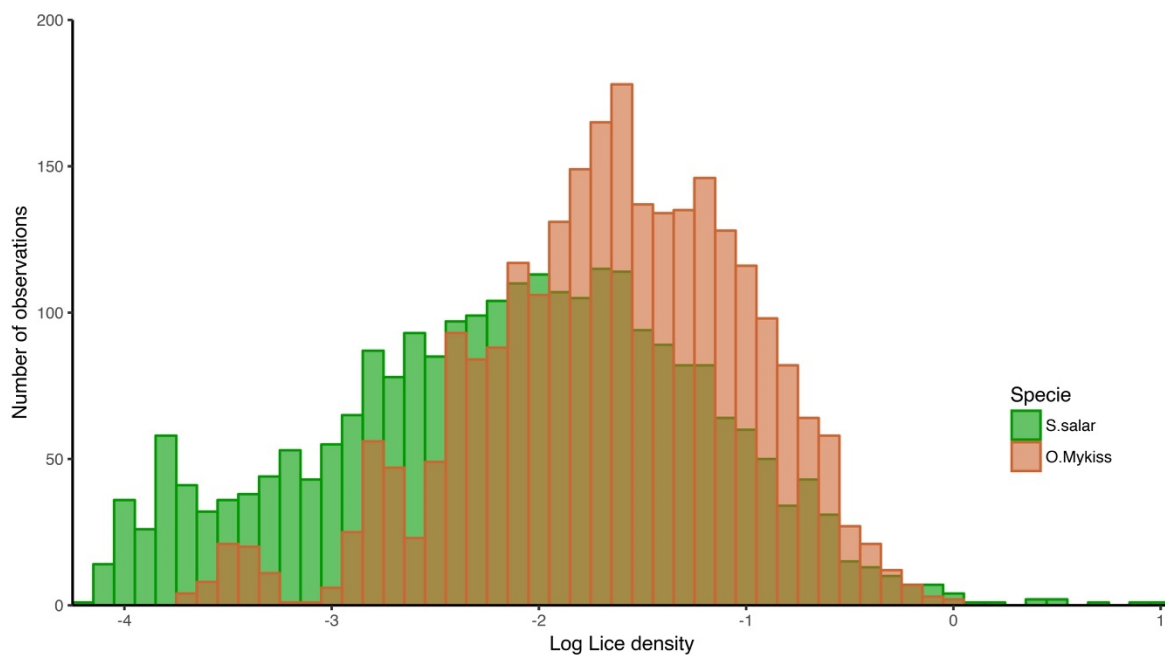

408

409 **Figure1.** Histogram for log lice density (LogLD) for *S. salar* (green) and *O. mykiss*

410 (orange).

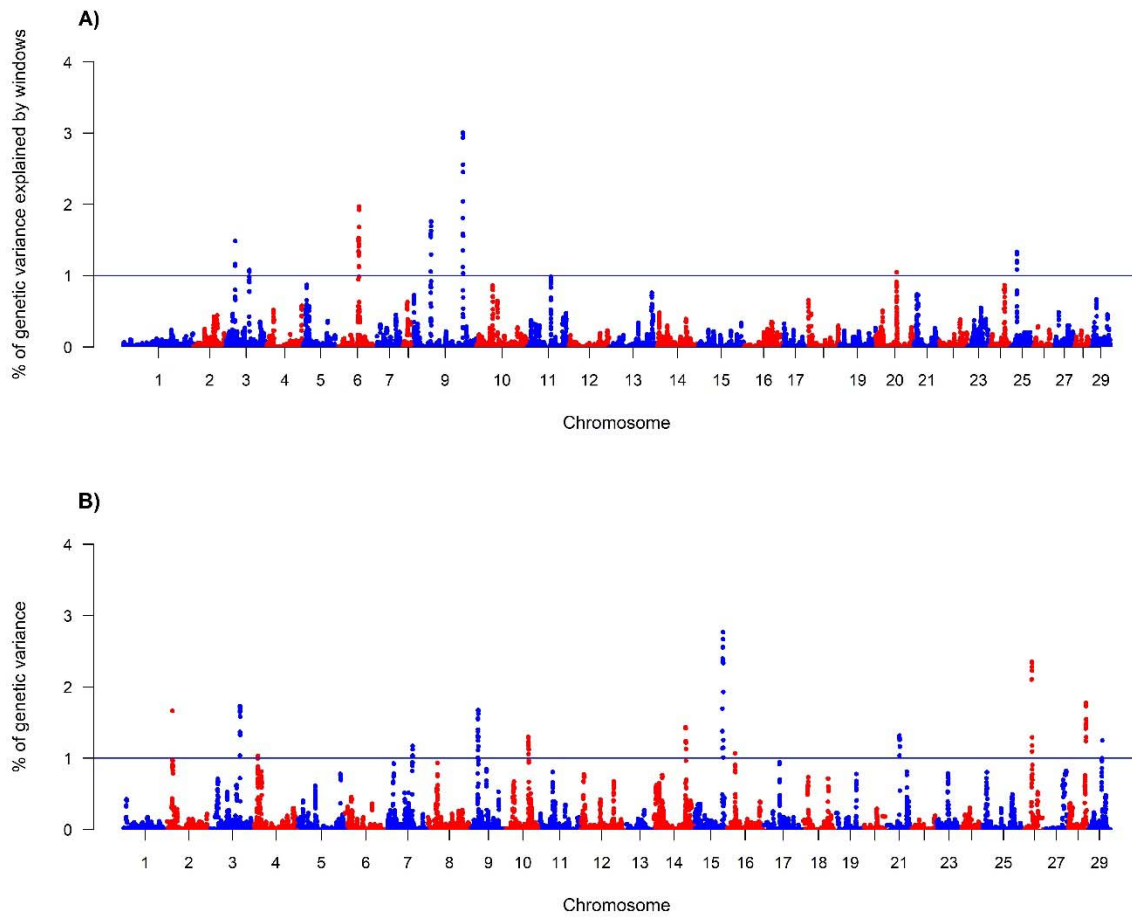

411

412 **Figure 2.** Weighted single-step GBLUP (wssGBLUP) for Log sea lice density (LogLD) in  
413 Atlantic salmon (A) and rainbow trout (B). Blue line indicates greater than 1% of the  
414 variance explained.

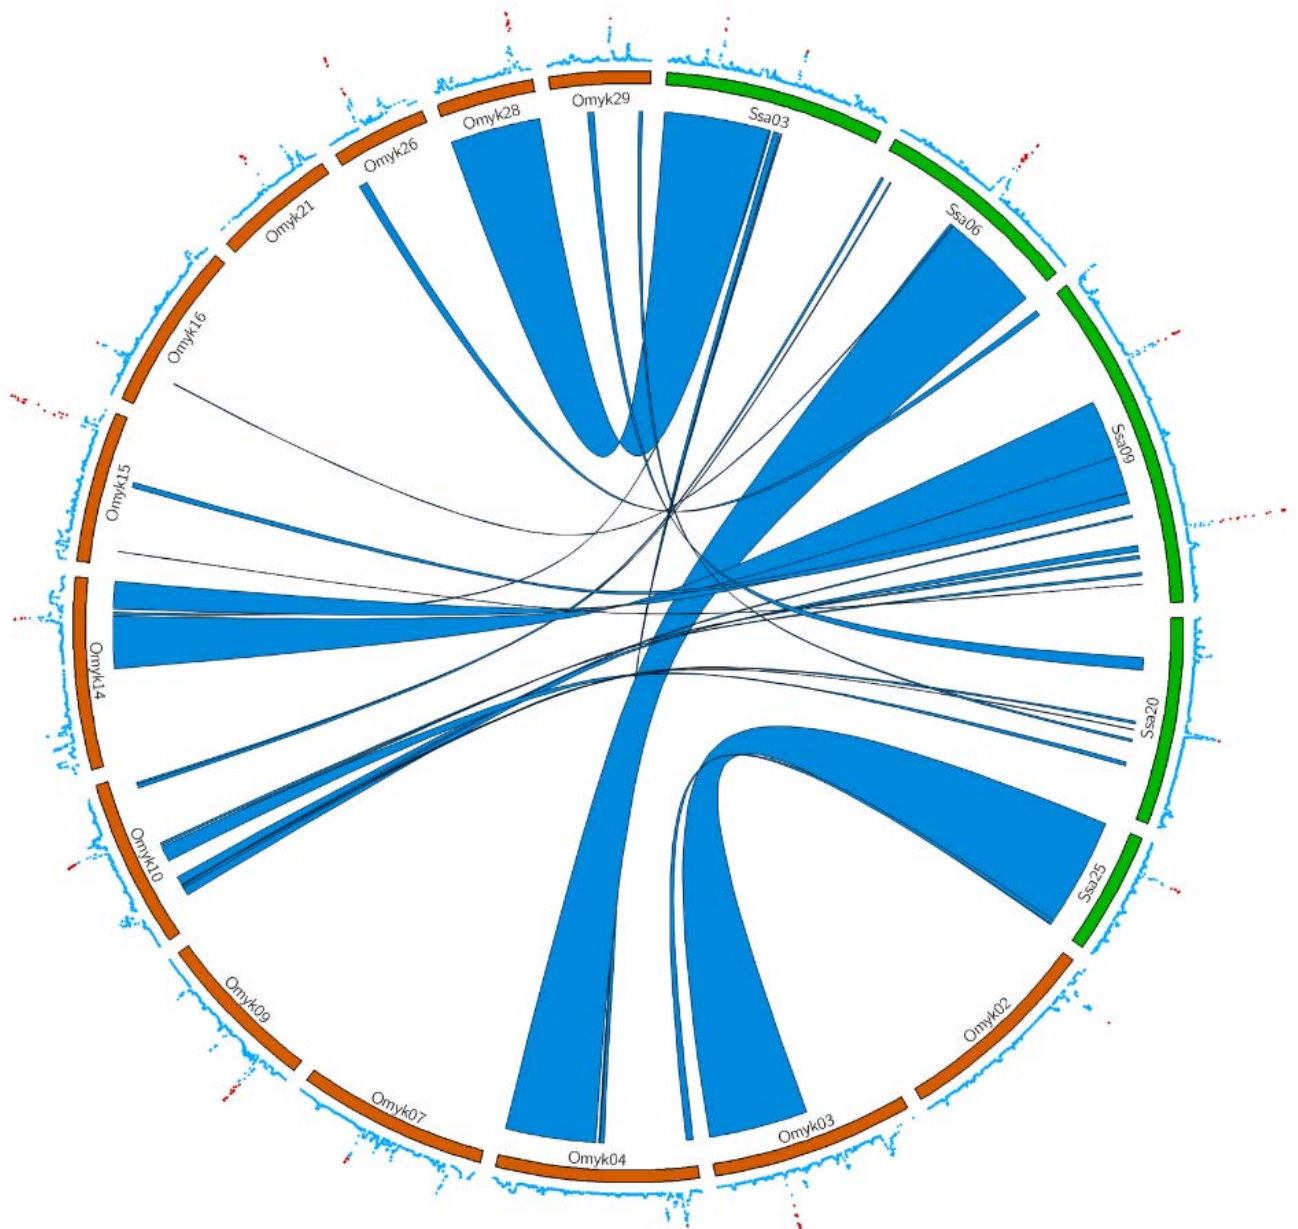

415

416 **Figure 3.** A circos plot of sea lice resistance. The inner ribbons mark syntenic regions  
417 between Atlantic salmon (green and labeled Ssa) and rainbow trout (orange and labeled  
418 *Omyk*) chromosomes. Values from the wssGBLUP analysis are plotted on the outer ring,  
419 with significant associations plotted in red (values  $\geq 1$ ).

420

421 **Table 1.** Summary statistics for body weight (BW) and lice count (LC) in Atlantic salmon  
422 and rainbow trout.

| Species          | Mean BW<br>(g) | SD <sup>1</sup> BW<br>(g) | Min<br>BW(g) | Max BW<br>(g) | LC mean | LC SD | LC min | LC max |
|------------------|----------------|---------------------------|--------------|---------------|---------|-------|--------|--------|
| <i>S. salar</i>  | 278.1          | 90.3                      | 104.0        | 569.0         | 5.9     | 6.61  | 0      | 106    |
| <i>O. mykiss</i> | 173.1          | 31.4                      | 86.0         | 265           | 6.1     | 4.22  | 0      | 28     |

423

424 <sup>1</sup> SD (standard deviation)

425

426

427

428

429

430

431

432

433

434

435

436

437

438

439

440

441

442

443

444

445

446 **Table 2.** Window position and genetic variance of representative SNP.

447

| Window Position (bp) <sup>1</sup> | Chr <sup>2</sup> | First and last SNP of window | Var (%) <sup>3</sup> |
|-----------------------------------|------------------|------------------------------|----------------------|
| <b>Atlantic Salmon</b>            |                  |                              |                      |
| 111398941-112068765               | 9                | Affx-93376378-Affx-93407247  | 3.00                 |
| 46812870-48951308                 | 6                | Affx-93402585-Affx-93349216  | 1.97                 |
| 38862311-39791664                 | 9                | Affx-93301094-Affx-93369286  | 1.76                 |
| 21387020-22266613                 | 3                | Affx-93351937-Affx-93441285  | 1.48                 |
| 13302321-13992142                 | 25               | Affx-93449253-Affx-93379811  | 1.33                 |
| 53395987-54096750                 | 3                | Affx-93397375-Affx-93327854  | 1.08                 |
| 47471286-48390124                 | 20               | Affx-93269128-Affx-93365186  | 1.05                 |
| <b>Rainbow trout</b>              |                  |                              |                      |
| 55155679-55750071                 | 15               | Affx-88957834-Affx-88937607  | 2.77                 |
| 14742278- 15862261                | 26               | Affx-88926342-Affx-88913419  | 2.35                 |
| 35337013- 36760480                | 28               | Affx-88961757-Affx-88909402  | 1.77                 |
| 57059237- 57975684                | 3                | Affx-88911532-Affx-88917594  | 1.73                 |
| 14313209- 15091943                | 9                | Affx-88944322-Affx-88927798  | 1.67                 |
| 10428810- 11808090                | 2                | Affx-88922063-Affx-88937734  | 1.66                 |
| 62615440- 63610148                | 14               | Affx-88942436-Affx-88960365  | 1.43                 |
| 27521395-28664751                 | 21               | Affx-88932888-Affx-88952962  | 1.31                 |
| 43708499-44788897                 | 10               | Affx-88912735-Affx-88908041  | 1.29                 |
| 26370287-27397531                 | 29               | Affx-88925775-Affx-88920967  | 1.25                 |
| 50072755-50809742                 | 7                | Affx-88956194-Affx-88906442  | 1.17                 |
| 15571716-16056405                 | 16               | Affx-88940047-Affx-88947010  | 1.07                 |
| 7055909-8035171                   | 4                | Affx-88935786-Affx-88957720  | 1.03                 |

448

449 <sup>1</sup>Window position in base pair (BP).

450 <sup>2</sup>Chromosome (Chr).

451 <sup>3</sup>Variance (Var)

452 **Table 3.** Genes identified as possible candidates for sea lice resistance in Atlantic salmon.

| Protein name                                                        | Gene ID <sup>1</sup> | Location (BP) <sup>2</sup> | Chr <sup>3</sup> | Function        |
|---------------------------------------------------------------------|----------------------|----------------------------|------------------|-----------------|
| <i>Tenascin R</i>                                                   | <i>tnr</i>           | 22.113,558 - 22.312,716    | 3                | Immune response |
| <i>T-cell activation Rho GTPase-activating protein</i>              | <i>tagap</i>         | 47.344,667 - 47.350,357    | 6                | Immune response |
| <i>Forkhead box protein N1-like isoform X1</i>                      | LOC106612922         | 111.631,268 - 111.668,978  | 9                | Immune response |
| <i>Immunoglobulin superfamily member 11-like</i>                    | <i>igsf11</i>        | 47.453,435 - 47.570,948    | 20               | Immune response |
| <i>Tripartite motif-containing 45</i>                               | <i>trim45</i>        | 31.699,662 - 31.705,320    | 25               | Immune response |
| <i>pre-B-cell leukemia transcription factor 1-like</i>              | LOC106607421         | 43.977,204 - 44.037,235    | 6                | Immune response |
| <i>Bromodomain-containing protein 4-like isoform</i>                | LOC106600922         | 53.482,098 - 53.526,053    | 3                | Immune response |
| <i>PAPPALYSIN-2</i>                                                 | <i>pappa2</i>        | 21.972,287 - 22.050,408    | 3                | Metalloprotease |
| <i>Carboxypeptidase D</i>                                           | <i>cdpa</i>          | 111.778,091 - 111.828,613  | 9                | Metalloprotease |
| <i>GEM-interacting protein-like isoform X3</i>                      | LOC106600913         | 53.672,635 - 53.709,985    | 3                | Metalloprotease |
| <i>Epidermal growth factor</i>                                      | <i>egf</i>           | 55.552,926 - 55.584,698    | 9                | Cytoskeletal    |
| <i>Procollagen galactosyltransferase 1</i>                          | LOC106607427         | 43.820,342 - 43.851,337    | 6                | Cytoskeletal    |
| <i>Heat shock protein HSP 90-beta</i>                               | <i>hs90b</i>         | 48.362,362 - 48.374,359    | 6                | Cytoskeletal    |
| <i>Collagen alpha-1(XXVIII) chain-like</i>                          | <i>col28a1</i>       | 13.872,240 - 13.923,778    | 25               | Cytoskeletal    |
| <i>gap junction alpha-4 protein-like</i>                            | LOC106611294         | 39.373,024 - 39.373,931    | 9                | Cytoskeletal    |
| <i>Pleckstrin homology domain-containing family H member 1-like</i> | LOC106611291         | 39.101,628 - 39.165,084    | 9                | Cytoskeletal    |
| <i>serine/threonine-protein kinase OSR1-like</i>                    | LOC106600551         | 44.726,186 - 44.781,350    | 3                | Cytoskeletal    |
| <i>rho-related GTP-binding protein RhoB-like</i>                    | LOC106607565         | 46.401,032 - 46.403,034    | 6                | Cytoskeletal    |
| <i>pleckstrin homology and RhoGEF domain containing G1</i>          | <i>plekhg1</i>       | 64.024,693 - 64.178,709    |                  | Cytoskeletal    |

453

454 <sup>1</sup>Gene identification (Gene ID) from the NCBI database GenBank assembly accession:

455 GCA\_000233375.4.

456 <sup>2</sup>Location in base pair (BP).

457 <sup>3</sup>Chromosome (Chr).

458

459

460

461

462

463

464

465

466

467

468

469

470

471

472

473

474

475

476



477 **Table 4.** Genes identified as possible candidates for sea lice resistance in Rainbow trout.

| <i>Protein name</i>                                            | <i>Gene ID</i> <sup>1</sup> | <i>Location (BP)</i> <sup>2</sup> | <i>Chr</i> <sup>3</sup> | <i>Function</i> |
|----------------------------------------------------------------|-----------------------------|-----------------------------------|-------------------------|-----------------|
| <i>Nuclear factor of activated T-cells, cytoplasmic 1-like</i> | LOC110518416                | 35.501,191 - 35.592,262           | 3                       | Immune response |
| <i>Thymocyte selection-associated family member 2</i>          | <i>themist2</i>             | 33.704,133 - 33.726,370           | 4                       | Immune response |
| <i>C-C motif chemokine receptor 10</i>                         | <i>ccr10</i>                | 21.961,454 - 21.965,777           | 16                      | Immune response |
| <i>T-box 21</i>                                                | <i>tbx21</i>                | 15.560,804 - 15.578,932           | 16                      | Immune response |
| <i>Leucine-rich repeat-containing protein 15-like</i>          | LOC110539182                | 11.715,000 - 11.717,281           | 2                       | Immune response |
| <i>Toll-like receptor 13</i>                                   | LOC110490289                | 48.117,536 - 48.120,927           | 15                      | Immune response |
| <i>Adhesion G protein-coupled receptor L3</i>                  | LOC110531730                | 14.279,162 - 14.524,070           | 9                       | Immune response |
| <i>Inhibin Beta A Chain</i>                                    | <i>inhba</i>                | 36.734,061 - 36.745,506           | 28                      | Immune response |
| <i>interferon gamma2</i>                                       | <i>ifng2</i>                | 153,268 – 183,367                 | Unplaced Scaffold       | Immune response |
| <i>heat shock protein family A (Hsp70) member 8</i>            | <i>hspa8</i>                | 17.691,060 - 17.715,579           | 10                      | Immune response |
| <i>Fibroblast growth factor</i>                                | <i>fgf13</i>                | 26.660,561 - 26.715,195           | 29                      | Cytoskeletal    |
| <i>Fibroblast growth factor</i>                                | <i>fgf11</i>                | 38.417,625 - 38.489,806           | 10                      | Cytoskeletal    |
| <i>Alpha-actinin-3</i>                                         | <i>3a, 3b</i>               | 43.817,039 - 43.841,681           | 10                      | Cytoskeletal    |
| <i>Dipeptidyl peptidase 3</i>                                  | <i>ddp3</i>                 | 33.026,452 – 33.044,218           | 29                      | Cytoskeletal    |
| <i>ELMO/CED-12 domain-containing 1</i>                         | <i>elmod1</i>               | 16.419,827 – 16.441,415           | 10                      | Cytoskeletal    |
| <i>cysteine-rich protein 2-like</i>                            | LOC106611283                | 38.639,636 – 38.675,313           | 9                       | Cytoskeletal    |
| <i>coagulation factor IX-like</i>                              | LOC110534144                | 43.984,179 – 43.991,091           | 10                      | Cytoskeletal    |
| <i>lysyl oxidase homolog 1</i>                                 | LOC110526332                | 59.312,382 – 59.352,343           | 26                      | Cytoskeletal    |

|                                                 |                     |                         |    |                 |
|-------------------------------------------------|---------------------|-------------------------|----|-----------------|
| <i>isoform X2</i>                               |                     |                         |    |                 |
| <i>AFG3 Like Matrix AAA Peptidase Subunit 2</i> | <i>afg3l2</i>       | 35.488,672 – 35.515,514 | 28 | Metalloprotease |
| <i>Afg3-Like Protein 1</i>                      | <i>LOC110506600</i> | 19.946,590 – 19.959,716 | 26 | Metalloprotease |

478

479 <sup>1</sup>Gene identification (Gene ID) from the NCBI database GenBank assembly accession:

480 GCA\_002163495.1.

481 <sup>2</sup>Location in base pair (BP).

482 <sup>3</sup>Chromosome (Chr).

483   References

- 484   1.    Boxshall, A. & Bravo, S. On the identity of the common Caligus (Copepoda:  
485       *Siphonostomatoida: Caligidae*) from salmonid netpen systems in southern Chile.  
486       *Contrib. to Zool.* **69**, 137–146 (2000).
- 487   2.    Costello, M. J. How sea lice from salmon farms may cause wild salmonid declines in  
488       Europe and North America and be a threat to fishes elsewhere. *Proc. R. Soc. B*  
489       *Biol. Sci.* **276**, 3385–3394 (2009).
- 490   3.    Abolofia, J., Asche, F. & Wilen, J. E. The Cost of Lice: Quantifying the Impacts of  
491       Parasitic Sea Lice on Farmed Salmon. *Mar. Resour. Econ.* **32**, 329–349 (2017).
- 492   4.    Gonzalez Laura & Juan, C. Life cycle of *Caligus rogercresseyi*, (Copepoda:  
493       *Caligidae*) parasite of Chilean reared salmonids. *Aquaculture* **220**, 101–117 (2003).
- 494   5.    Lhorente, J. P. *et al.* Quantitative genetic basis for resistance to *Caligus*  
495       *rogercresseyi* sea lice in a breeding population of Atlantic salmon (*Salmo salar*).  
496       *Aquaculture* **324–325**, 55–59 (2012).
- 497   6.    Hamilton-West, C. *et al.* Epidemiological description of the sea lice (*Caligus*  
498       *rogercresseyi*) situation in southern Chile in August 2007. *Prev. Vet. Med.* **104**, 341–  
499       345 (2012).
- 500   7.    Correa, K. *et al.* Genome wide association study for resistance to *Caligus*  
501       *rogercresseyi* in Atlantic salmon (*Salmo salar*) using a 50K SNP genotyping array.  
502       *Aquaculture* **472**, 61–65 (2017).
- 503   8.    Yáñez, J. M. *et al.* Genetic co-variation between resistance against both *Caligus*  
504       *rogercresseyi* and *Piscirickettsia salmonis*, and body weight in Atlantic salmon  
505       (*Salmo salar*). *Aquaculture* **433**, 295–298 (2014).

- 506 9. Ødegård, J. *et al.* Genomic prediction in an admixed population of Atlantic salmon  
507 (*Salmo salar*). *Front. Genet.* **5**, 1–8 (2014).
- 508 10. Tsai, H. Y. *et al.* Genomic prediction of host resistance to sea lice in farmed Atlantic  
509 salmon populations. *Genet. Sel. Evol.* **48**, 1–11 (2016).
- 510 11. Bassini, N. *et al.* Genetic parameters for resistance to *Caligus rogercresseyi*,  
511 *Piscirickettsia salmonis* and body weight in rainbow trout (*Oncorhynchus mykiss*).  
512 *Aquaculture* **472**, 127–127 (2017).
- 513 12. Correa, K., Banger, R., Figueroa, R., Lhorente, J. P. & Yáñez, J. M. The use of  
514 genomic information increases the accuracy of breeding value predictions for sea  
515 louse (*Caligus rogercresseyi*) resistance in Atlantic salmon (*Salmo salar*). *Genet.*  
516 *Sel. Evol.* **49**, 1–5 (2017).
- 517 13. Palti, Y. *et al.* The development and characterization of a 57K single nucleotide  
518 polymorphism array for rainbow trout. *Mol. Ecol. Resour.* **15**, 662–672 (2015).
- 519 14. Houston, R. D. *et al.* Development and validation of a high density SNP genotyping  
520 array for Atlantic salmon (*Salmo salar*). *BMC Genomics* **15**, 1–13 (2014).
- 521 15. Yáñez, J. . *et al.* Genomewide single nucleotide polymorphism discovery in Atlantic  
522 salmon (*Salmo salar*): validation in wild and farmed American and European  
523 populations. **16**, 1002–1011 (2016).
- 524 16. Berthelot, C. *et al.* The rainbow trout genome provides novel insights into evolution  
525 after whole-genome duplication in vertebrates. *Nat. Commun.* **5**, (2014).
- 526 17. Lien, S. *et al.* The Atlantic salmon genome provides insights into rediploidization.  
527 *Nature* **533**, 200–205 (2016).
- 528 18. Correa, K. *et al.* Genome-wide association analysis reveals loci associated with

- 529 resistance against *Piscirickettsia salmonis* in two Atlantic salmon (*Salmo salar*)  
530 chromosomes. *BMC Genomics* **16**, 1–9 (2015).
- 531 19. Rochat, T. *et al.* Genomic characterization of *Flavobacterium psychrophilum*  
532 serotypes and development of a multiplex PCR-based serotyping scheme. *Front.*  
533 *Microbiol.* **8**, 1–10 (2017).
- 534 20. Vallejo, R. L. *et al.* Similar genetic architecture with shared and unique quantitative  
535 trait loci for bacterial cold water disease resistance in two rainbow trout breeding  
536 populations. *Front. Genet.* **8**, 1–15 (2017).
- 537 21. Hardisson, R. C. Comparative Genomics. *Brenner's Encycl. Genet. Second Ed.* **1**,  
538 102–105 (2013).
- 539 22. Fang, G., Bhardwaj, N., Robilotto, R. & Gerstein, M. B. Getting started in gene  
540 orthology and functional analysis. *PLoS Comput. Biol.* **6**, (2010).
- 541 23. Reid, D. P., Szanto, A., Glebe, B., Danzmann, R. G. & Ferguson, M. M. QTL for  
542 body weight and condition factor in Atlantic salmon (*Salmo salar*): Comparative  
543 analysis with rainbow trout (*Oncorhynchus mykiss*) and Arctic charr (*Salvelinus*  
544 *alpinus*). *Heredity (Edinb.)* **94**, 166–172 (2005).
- 545 24. Moghadam, H. K., Ferguson, M. M. & Danzmann, R. G. Evolution of Hox clusters in  
546 salmonidae: A comparative analysis between atlantic salmon (*Salmo salar*) and  
547 rainbow trout (*Oncorhynchus mykiss*). *J. Mol. Evol.* **61**, 636–649 (2005).
- 548 25. Woram, R. A. Comparative Genome Analysis of the Primary Sex-Determining Locus  
549 in Salmonid Fishes. *Genome Res.* **13**, 272–280 (2003).
- 550 26. Robledo, D., Gutiérrez, A. P., Barría, A., Yáñez, J. M. & Houston, R. D. Gene  
551 expression response to sea lice in Atlantic salmon skin: RNA sequencing

- 552 comparison between resistant and susceptible animals. *Front. Genet.* **9**, 1–10  
553 (2018).
- 554 27. Barriá, A. *et al.* Genomic Predictions and Genome-Wide Association Study of  
555 Resistance Against *Piscirickettsia salmonis* in Coho Salmon (*Oncorhynchus*  
556 *kisutch*) Using ddRAD Sequencing. *G3; Genes/Genomes/Genetics* **8**,  
557 g3.200053.2018 (2018).
- 558 28. Palaiokostas, C., Ferrareso, S., Franch, R., Houston, R. D. & Bargelloni, L.  
559 Genomic Prediction of Resistance to Pasteurellosis in Gilthead Sea Bream (*Sparus*  
560 *aurata*) Using 2b-RAD Sequencing. *G3; Genes/Genomes/Genetics* **6**, 3693–3700  
561 (2016).
- 562 29. Palaiokostas, C. *et al.* Genome-wide association and genomic prediction of  
563 resistance to viral nervous necrosis in European sea bass (*Dicentrarchus labrax*)  
564 using RAD sequencing. *Genet. Sel. Evol.* **50**, 1–11 (2018).
- 565 30. Rochus, C. M. *et al.* Genome-wide association analysis of salmon lice  
566 (*Lepeophtheirus salmonis*) resistance in a North American Atlantic salmon  
567 population. *Aquac. Res.* **49**, 1329–1338 (2018).
- 568 31. Robledo, D., Gutierrez, A. P., Barria, A., Lhorente, J. P. & Houston, R. Discovery  
569 and functional annotation of quantitative trait loci affecting resistance to sea lice in  
570 Atlantic salmon. (2018). doi:10.1101/455626
- 571 32. Wiegertjes, G. F., Wentzel, A. S., Spaink, H. P., Elks, P. M. & Fink, I. R. Polarization  
572 of immune responses in fish: The ‘macrophages first’ point of view. *Mol. Immunol.*  
573 **69**, 146–156 (2016).
- 574 33. Tamehiro, N. *et al.* T-cell activation RhoGTPase-activating protein plays an

- 575 important role in T H 17-cell differentiation. *Immunol. Cell Biol.* **95**, 729–735 (2017).
- 576 34. Ruegg, C. R., Chiquet-Ehrismann, R. & Alkan, S. S. Tenascin, an extracellular  
577 matrix protein, exerts immunomodulatory activities. *Proc. Natl. Acad. Sci.* **86**, 7437–  
578 7441 (1989).
- 579 35. Clark, R. A., Erickson, H. P. & Springer, T. A. Tenascin supports lymphocyte rolling.  
580 *J. Cell Biol.* **137**, 755–765 (1997).
- 581 36. Fast, M. D. Fish immune responses to parasitic copepod (namely sea lice) infection.  
582 *Dev. Comp. Immunol.* **43**, 300–312 (2014).
- 583 37. Berry, G. *et al.* Distinct Effects of T-bet in TH1 Lineage Commitment and IFN-  
584 gamma Production in CD4 and CD8 T Cells. *Science (80-. ).* **295**, 338–342 (2002).
- 585 38. Townsend, M. J. *et al.* T-bet regulates the terminal maturation and homeostasis of  
586 NK and V $\alpha$ 14i NKT cells. *Immunity* **20**, 477–494 (2004).
- 587 39. Coffey, P. J. & Burgering, B. M. T. Forkhead-box transcription factors and their role  
588 in the immune system. *Nat. Rev. Immunol.* **4**, 889–899 (2004).
- 589 40. Veerle, J. & Jozef, G. Protein phosphatase 2A: a highly regulated family of  
590 serine/threonine phosphatases implicated in cell growth and signalling. *Biochem. J.*  
591 **353**, 417–439 (2001).
- 592 41. McNab, F. W., Rajsbaum, R., Stoye, J. P. & O'Garra, A. Tripartite-motif proteins and  
593 innate immune regulation. *Curr. Opin. Immunol.* **23**, 46–56 (2011).
- 594 42. Fast, M. D., Muise, D. M., Easy, R. E., Ross, N. W. & Johnson, S. C. The effects of  
595 *Lepeophtheirus salmonis* infections on the stress response and immunological  
596 status of Atlantic salmon (*Salmo salar*). *Fish Shellfish Immunol.* **21**, 228–241 (2006).
- 597 43. Skugor, S., Glover, K. A., Nilsen, F. & Krasnov, A. Local and systemic gene

- 598 expression responses of Atlantic salmon (*Salmo salar* L.) to infection with the  
599 salmon louse (*Lepeophtheirus salmonis*). *BMC Genomics* **9**, 1–18 (2008).
- 600 44. Stenmark, H. Rab GTPases as coordinators of vesicle traffic. *Nat. Rev. Mol. Cell*  
601 *Biol.* **10**, 513–525 (2009).
- 602 45. Johnson, J. L., Monfregola, J., Napolitano, G., Kiosses, W. B. & Catz, S. D.  
603 Vesicular trafficking through cortical actin during exocytosis is regulated by the  
604 Rab27a effector JFC1/Slp1 and the RhoA-GTPase-activating protein Gem-  
605 interacting protein. *Mol. Biol. Cell* **23**, 1902–1916 (2012).
- 606 46. Chen, J. *et al.* Expression and Function of the Epidermal Growth Factor Receptor in  
607 Physiology and Disease. *Physiol. Rev.* **96**, 1025–1069 (2016).
- 608 47. Brzostowski, J. A., Fey, P., Yan, J., Isik, N. & Jin, T. The Elmo family forms an  
609 ancient group of actin-regulating proteins. *Commun. Integr. Biol.* **2**, 337–340 (2009).
- 610 48. Lemmon, M. A., Ferguson, K. M. & Abrams, C. S. Pleckstrin homology domains and  
611 the cytoskeleton. *FEBS Lett.* **513**, 71–76 (2002).
- 612 49. Wang, T., Holland, J. W., Martin, S. A. M. & Secombes, C. J. Sequence and  
613 expression analysis of two T helper master transcription factors, T-bet and GATA3,  
614 in rainbow trout *Oncorhynchus mykiss* and analysis of their expression during  
615 bacterial and parasitic infection. *Fish Shellfish Immunol.* **29**, 705–715 (2010).
- 616 50. Lamalice, L., Le Boeuf, F. & Huot, J. Endothelial cell migration during angiogenesis.  
617 *Circ. Res.* **100**, 782–794 (2007).
- 618 51. Zou, J. *et al.* Identification and Bioactivities of IFN- in Rainbow Trout *Oncorhynchus*  
619 *mykiss*: The First Th1-Type Cytokine Characterized Functionally in Fish. *J.*  
620 *Immunol.* **175**, 2484–2494 (2005).



- 621 52. Bury, N. & Grosell, M. Iron acquisition by teleost fish. *Comp. Biochem. Physiol. - C*  
622 **135**, 76490 (2003).
- 623 53. Jones, S. R. M., Fast, M. D., Johnson, S. C. & Groman, D. B. Differential rejection of  
624 salmon lice by pink and chum salmon: Disease consequences and expression of  
625 proinflammatory genes. *Dis. Aquat. Organ.* **75**, 229–238 (2007).
- 626 54. Valenzuela-Muñoz, V. & Gallardo-Escárate, C. Iron metabolism modulation in  
627 Atlantic salmon infested with the sea lice *Lepeophtheirus salmonis* and *Caligus*  
628 *rogercresseyi*: A matter of nutritional immunity? *Fish Shellfish Immunol.* **60**, 97–102  
629 (2017).
- 630 55. Bateman, A. *et al.* UniProt: The universal protein knowledgebase. *Nucleic Acids*  
631 *Res.* **45**, D158–D169 (2017).
- 632 56. Moolenaar, W. H., Kranenburg, O., Postma, F. R. & Zondag, G. C. M.  
633 Lysophosphatidic acid: G-protein signalling and cellular responses. *Curr. Opin. Cell*  
634 *Biol.* **9**, 168–173 (1997).
- 635 57. Park, S. Y., Schinkmann, K. A. & Avraham, S. RAFTK/Pyk2 mediates LPA-induced  
636 PC12 cell migration. *Cell. Signal.* **18**, 1063–1071 (2006).
- 637 58. Hatch, W. C. *et al.* The related adhesion focal tyrosine kinase (RAFTK) is tyrosine  
638 phosphorylated and participates in colony-stimulating factor-1/macrophage colony-  
639 stimulating factor signaling in monocyte-macrophages. *Blood* **91**, 3967–73 (1998).
- 640 59. Keyse, S. M. Dual-specificity MAP kinase phosphatases (MKPs) and cancer.  
641 *Cancer Metastasis Rev.* **27**, 253–261 (2008).
- 642 60. Owens, D. M. & Keyse, S. M. Differential regulation of MAP kinase signalling by  
643 dual-specificity protein phosphatases. *Oncogene* **26**, 3203–3213 (2007).

- 644 61. J.M. Yáñez, S. Naswa, M.E. López, L. Bassini, M.E. Cabrejos, J. Gilbey, L.  
645 Bernatchez, A. Norris, C. Soto, J. Eisenhart, B. Simpson, R. Neira, J.P. Lhorente, P.  
646 Schnable, S. Newman, A. Mileham, N. D. Development of a 200K SNP Array for  
647 Atlantic Salmon: Exploiting Across Continents Genetic Variation. *Proc. 10th World*  
648 *Congr. Genet. Appl. to Livest. Prod.* 11–13 (2014).
- 649 62. Purcell, S. *et al.* PLINK: A Tool Set for Whole-Genome Association and Population-  
650 Based Linkage Analyses. *Am. J. Hum. Genet.* **81**, 559–575 (2007).
- 651 63. Legarra, A., Christensen, O. F. & Aguilar, I. M. Single Step, A General Approach For  
652 GenomicSelection. *Livest. Sci.* (2014). doi:10.1016/j.livsci.2014.04.029
- 653 64. Misztal, I., Aggrey, S. E. & Muir, W. M. Experiences with a single-step genome  
654 evaluation. *Poult. Sci.* **92**, 2530–2534 (2013).
- 655 65. Aguilar, I. *et al.* Hot topic: A unified approach to utilize phenotypic, full pedigree, and  
656 genomic information for genetic evaluation of Holstein final score<sup>1</sup>. *J. Dairy Sci.* **93**,  
657 743–752 (2010).
- 658 66. Reis Neto, R. V., Yoshida, G. M., Lhorente, J. P. & Yáñez, J. M. Genome-wide  
659 association analysis for body weight identifies candidate genes related to  
660 development and metabolism in rainbow trout (*Oncorhynchus mykiss*). *Mol. Genet.*  
661 *Genomics* **0**, 0 (2019).
- 662 67. Team, R. D. C. R: A language and environment for statistical computing. (2008).
- 663 68. Pearse, D. E. *et al.* Sex-dependent dominance maintains migration supergene in  
664 rainbow trout. *bioRxiv* 504621 (2018). doi:10.1101/504621
- 665 69. Li, H. *et al.* The Sequence Alignment/Map format and SAMtools. *Bioinformatics* **25**,  
666 2078–2079 (2009).

- 667 70. Soderlund, C., Bomhoff, M. & Nelson, W. M. SyMAP v3.4: A turnkey synteny  
668 system with application to plant genomes. *Nucleic Acids Res.* **39**, (2011).
- 669 71. Connors, J. *et al.* Circos: An information aesthetic for comparative genomics.  
670 *Genome Res.* **19**, 1639–1645 (2009).
- 671 72. Madden, T. The BLAST Sequence Analysis Tool. in *The NCBI Handbook* (eds.  
672 McEntyre J & Ostell J.) (Bethesda (MD): National Center for Biotechnology  
673 Information (US), 2002).
- 674 73. Conesa, A. *et al.* Blast2GO: a universal tool for annotation , visualization and  
675 analysis in functional genomics research. **21**, 3674–3676 (2005).
- 676 74. Emms, D. M. & Kelly, S. OrthoFinder: solving fundamental biases in whole genome  
677 comparisons dramatically improves orthogroup inference accuracy. *Genome Biol.*  
678 **16**, 1–14 (2015).
- 679
- 680
